# Supplementary material
Source: HighWire-hosted journal article supplement (https://www.cmajopen.ca/highwire/filestream/88249/field_highwire_adjunct_files/4/open-2021-0192-5-at.pdf)
Supplement: open-2021-0192-5-at.pdf [file open-2021-0192-5-at.pdf]

## 1 Supplementary Material

| Supplemental Table 4. Quality assessment of included studies |                                                                                                                                                                                                                                                                                                                                                                                                                                           |                                                                                                   |                                                                                                                                                         |                                       |                                    |
|--------------------------------------------------------------|-------------------------------------------------------------------------------------------------------------------------------------------------------------------------------------------------------------------------------------------------------------------------------------------------------------------------------------------------------------------------------------------------------------------------------------------|---------------------------------------------------------------------------------------------------|---------------------------------------------------------------------------------------------------------------------------------------------------------|---------------------------------------|------------------------------------|
| Author (Year)                                                | Appropriate data source/outcome measure                                                                                                                                                                                                                                                                                                                                                                                                   | Appropriate time frame studied?                                                                   | Appropriate statistical tests used?                                                                                                                     | Study design suitability <sup>1</sup> | Overall quality score <sup>2</sup> |
| Sproule (1988)                                               | <ul style="list-style-type: none"> <li>Data sources appropriate               <ul style="list-style-type: none"> <li>- Statistics Canada; Canadian Center for Justice Statistics</li> </ul> </li> <li>Outcome measure appropriate               <ul style="list-style-type: none"> <li>- Canadian firearm homicide rates</li> </ul> </li> </ul>                                                                                           | No: 1972-1976 (pre-Bill C-51), 1977-1982 (Bill C-51 provisions came into effect in 1978 and 1979) | No: Violated test postulates, weak statistical power, failed to measure immediate or gradual effects of the law, lacked 3 <sup>rd</sup> party variables | Moderate                              | 1                                  |
| Mundt (1990)                                                 | <ul style="list-style-type: none"> <li>Data sources appropriate               <ul style="list-style-type: none"> <li>- Statistics Canada; Canadian Center for Justice Statistics; US Justice Dept; National Center for Health Statistics</li> </ul> </li> <li>Outcome measure appropriate               <ul style="list-style-type: none"> <li>- Canadian and US firearm homicide, suicide, accidental death rates</li> </ul> </li> </ul> | Yes: 1971-1988 (Bill C-51 provisions came into effect in 1978 and 1979)                           | No: Visual inspection was performed without statistical tests                                                                                           | Moderate                              | 1                                  |
| Rich (1990)                                                  | <ul style="list-style-type: none"> <li>Data sources appropriate               <ul style="list-style-type: none"> <li>- Office of the Chief Coroner for Ontario</li> </ul> </li> <li>Outcome measure appropriate               <ul style="list-style-type: none"> <li>- Canadian firearm homicide, suicide, accidental death rates</li> </ul> </li> </ul>                                                                                  | Yes: 1973-1977 (pre-Bill C-51), 1979-1983 (post-Bill C-51)                                        | No: Violated test postulates, weak statistical power, failed to measure immediate or gradual effects of the law, lacked 3 <sup>rd</sup> party variables | Moderate                              | 1                                  |
| Mauser (1992)                                                | <ul style="list-style-type: none"> <li>Data sources appropriate               <ul style="list-style-type: none"> <li>- Statistics Canada; Canadian Center for Justice Statistics; Employment and Immigration Canada; Canadian Dept of Indian Affairs and Northern Affairs</li> </ul> </li> <li>Outcome measure appropriate               <ul style="list-style-type: none"> <li>- Canadian firearm homicide rates</li> </ul> </li> </ul>  | Yes: 1968-1977 (pre-Bill C-51), 1978-1988 (post-Bill C-51)                                        | Yes: Pooled cross-section time series model                                                                                                             | Moderate                              | 3                                  |
| Leenaars (1993,1994 1996,1997b 2001,2003)                    | <ul style="list-style-type: none"> <li>Data sources appropriate               <ul style="list-style-type: none"> <li>- Statistics Canada</li> </ul> </li> <li>Outcome measure appropriate               <ul style="list-style-type: none"> <li>- Canadian firearm homicide and suicide rates</li> </ul> </li> </ul>                                                                                                                       | Yes: 1969-1976 (pre-Bill C-51), 1978-1985 (post-Bill C-51)                                        | Yes: Interrupted time-series, multiple regression analysis                                                                                              | Moderate                              | 3                                  |
| Carrington (1994a)                                           | <ul style="list-style-type: none"> <li>Data sources appropriate               <ul style="list-style-type: none"> <li>- Statistics Canada</li> </ul> </li> <li>Outcome measure appropriate               <ul style="list-style-type: none"> <li>- Ontario firearm suicide rates</li> </ul> </li> </ul>                                                                                                                                     | Yes: 1965-1977 (pre-Bill C-51), 1979-1989 (post-Bill C-51)                                        | No: Violated test postulates, weak statistical power, failed to measure immediate or gradual effects of the law, lacked 3 <sup>rd</sup> party variables | Moderate                              | 1                                  |

|                    |                                                                                                                                                                                                                                                                                                                          |                                                                             |                                                                                                                                                         |          |   |
|--------------------|--------------------------------------------------------------------------------------------------------------------------------------------------------------------------------------------------------------------------------------------------------------------------------------------------------------------------|-----------------------------------------------------------------------------|---------------------------------------------------------------------------------------------------------------------------------------------------------|----------|---|
| Carrington (1994b) | <ul style="list-style-type: none"> <li>• Data sources appropriate <ul style="list-style-type: none"> <li>- Statistics Canada</li> </ul> </li> <li>• Outcome measure appropriate <ul style="list-style-type: none"> <li>- Canadian firearm suicide rates</li> </ul> </li> </ul>                                           | Yes: 1965-1977 (pre-Bill C-51), 1979-1989 (post-Bill C-51)                  | No: Violated test postulates, weak statistical power, failed to measure immediate or gradual effects of the law, lacked 3 <sup>rd</sup> party variables | Moderate | 1 |
| Leenaars (1997a)   | <ul style="list-style-type: none"> <li>• Data sources appropriate <ul style="list-style-type: none"> <li>- Statistics Canada</li> </ul> </li> <li>• Outcome measure appropriate <ul style="list-style-type: none"> <li>- Canadian firearm accidental death rates</li> </ul> </li> </ul>                                  | Yes: 1969-1976 (pre-Bill C-51), 1978-1985 (post-Bill C-51)                  | No: Violated test postulates, weak statistical power, failed to measure immediate or gradual effects of the law, lacked 3 <sup>rd</sup> party variables | Moderate | 1 |
| Bridges (2004)     | <ul style="list-style-type: none"> <li>• Data sources appropriate <ul style="list-style-type: none"> <li>- Statistics Canada</li> </ul> </li> <li>• Outcome measure appropriate <ul style="list-style-type: none"> <li>- Canadian firearm homicide and suicide rates</li> </ul> </li> </ul>                              | Yes: 1984-1990 (pre Bill C-17), 1991-1998 (post-Bill C-17)                  | No: Violated test postulates, weak statistical power, failed to measure immediate or gradual effects of the law, lacked 3 <sup>rd</sup> party variables | Moderate | 1 |
| Caron (2004)       | <ul style="list-style-type: none"> <li>• Data sources appropriate <ul style="list-style-type: none"> <li>- Quebec Coroner's Office</li> </ul> </li> <li>• Outcome measure appropriate <ul style="list-style-type: none"> <li>- Abitibi-Témiscamingue (Northern Quebec) firearm suicide rates</li> </ul> </li> </ul>      | Yes: 1986-1991 (pre-Bill C-17), 1992-1996 (post-Bill C-17)                  | No: Violated test postulates, weak statistical power, failed to measure immediate or gradual effects of the law, lacked 3 <sup>rd</sup> party variables | Moderate | 1 |
| Cheung (2005)      | <ul style="list-style-type: none"> <li>• Data sources appropriate <ul style="list-style-type: none"> <li>- Statistics Canada</li> </ul> </li> <li>• Outcome measure appropriate <ul style="list-style-type: none"> <li>- Canadian firearm suicide rates in adolescents 15-19 years</li> </ul> </li> </ul>                | Yes: 1979-1990 (pre-Bill C-17), 1991-1999 (post-Bill C-17)                  | No: Violated test postulates, weak statistical power, failed to measure immediate or gradual effects of the law, lacked 3 <sup>rd</sup> party variables | Moderate | 1 |
| Caron (2008)       | <ul style="list-style-type: none"> <li>• Data sources appropriate <ul style="list-style-type: none"> <li>- Quebec Coroner's Office;</li> <li>Quebec Statistics Institute</li> </ul> </li> <li>• Outcome measure appropriate <ul style="list-style-type: none"> <li>- Quebec firearm suicide rates</li> </ul> </li> </ul> | Yes: 1987-1991 (pre Bill C-17), 1992-2001 (post-Bill C-17)                  | Yes: Linear regression, interrupted time series, Pearson correlation coefficient analyses, multivariate analysis                                        | Moderate | 3 |
| Gagne (2010)       | <ul style="list-style-type: none"> <li>• Data sources appropriate <ul style="list-style-type: none"> <li>- Quebec Statistics Institute</li> </ul> </li> <li>• Outcome measure appropriate <ul style="list-style-type: none"> <li>- Quebec male firearm suicide rates</li> </ul> </li> </ul>                              | Yes: 1981-2006 (Bill C-17 implemented in 1992)                              | Yes: Joinpoint analysis, Poisson regression analysis                                                                                                    | Moderate | 3 |
| Blais (2011)       | <ul style="list-style-type: none"> <li>• Data sources appropriate <ul style="list-style-type: none"> <li>- Statistics Canada</li> </ul> </li> <li>• Outcome measure appropriate <ul style="list-style-type: none"> <li>- Canadian firearm homicide rates</li> </ul> </li> </ul>                                          | Yes: 1974-1977 (pre-Bill C-51), 1978-2004 (post-Bill C-51); 1974-1991 (pre- | Yes: Multiple time series analysis                                                                                                                      | Moderate | 3 |

|                  |                                                                                                                                                                                                                                                                                                                                                                                       |                                                                                                                          |                                                                                                      |          |   |
|------------------|---------------------------------------------------------------------------------------------------------------------------------------------------------------------------------------------------------------------------------------------------------------------------------------------------------------------------------------------------------------------------------------|--------------------------------------------------------------------------------------------------------------------------|------------------------------------------------------------------------------------------------------|----------|---|
|                  |                                                                                                                                                                                                                                                                                                                                                                                       | Bill C-17), 1992-2004 (post-Bill C-17); 1974-1997 (pre-Bill C-68), 1998-2004 (post-Bill C-68)                            |                                                                                                      |          |   |
| Langmann (2012)  | <ul style="list-style-type: none"> <li>• Data sources appropriate               <ul style="list-style-type: none"> <li>- Statistics Canada</li> </ul> </li> <li>• Outcome measure appropriate               <ul style="list-style-type: none"> <li>- Canadian firearm homicide rates</li> </ul> </li> </ul>                                                                           | Yes: 1974-2008 (Bill C-51 implemented in 1978, Bill C-17 implemented in 1992, Bill C-68 implemented in stages 1996-2003) | Yes: Multivariate regression, Interrupted time series, Poisson regression, ARIMA, Joinpoint analysis | Moderate | 3 |
| Linteau (2013)   | <ul style="list-style-type: none"> <li>• Data sources appropriate               <ul style="list-style-type: none"> <li>- Statistics Canada; Canadian Minister of Indian Affairs Office; Statistics Institute of Quebec</li> </ul> </li> <li>• Outcome measure appropriate               <ul style="list-style-type: none"> <li>- Quebec firearm homicide rates</li> </ul> </li> </ul> | Yes: 1974-1997 (pre-Bill C-68), 1998-2006 (post-Bill C-68)                                                               | Yes: Extreme bounds analysis                                                                         | Moderate | 3 |
| McPhedran (2013) | <ul style="list-style-type: none"> <li>• Data sources appropriate               <ul style="list-style-type: none"> <li>- Statistics Canada; Dept of Justice</li> </ul> </li> <li>• Outcome measure appropriate               <ul style="list-style-type: none"> <li>- Canadian firearm homicide rates</li> </ul> </li> </ul>                                                          | Yes: 1974-1995 (pre-Bill C-68), 1996-2009 (post-Bill C-68)                                                               | Yes: ARIMA, Zivot–Andrews structural breakpoint test                                                 | Moderate | 3 |
| Langmann (2020)  | <ul style="list-style-type: none"> <li>• Data sources appropriate               <ul style="list-style-type: none"> <li>- Statistics Canada</li> </ul> </li> <li>• Outcome measure appropriate               <ul style="list-style-type: none"> <li>- Canadian firearm homicide &amp; suicide rates</li> </ul> </li> </ul>                                                             | Yes: 1981-2016 (Bill C-17 passed in 1991; Bill C-68 was implemented in stages 1996-2003)                                 | Yes: Difference-in-difference analysis, negative binomial regression                                 | Moderate | 3 |

<sup>1</sup>Longitudinal prospective studies with a concurrent comparison group and multiple pre/post-intervention measurements were classified as having “greatest” design suitability; longitudinal studies without a concurrent comparison group but with multiple pre/post-intervention measurements were classified as “moderate”, and longitudinal studies without a concurrent comparison group and with only single pre/post-intervention measurements or with only post-intervention measurements were classified as having “least” design suitability.

<sup>2</sup>If all 4 metrics were achieved, a score of 3 (good quality) was assigned. If 2 to 3 metrics, including appropriate statistical testing, were achieved, a score of 2 (fair quality) was assigned. If 1 metric or 2 to 3 metrics without appropriate statistical testing were achieved, a score of 1 (poor quality) was assigned.
